# Supplementary material for: The effect of atomic nitrogen on the C60cage
Source: Royal Society of Chemistry journal article supplement (doi:10.1039/b914624e), 2009-11-18

## Supplementary Information

### The Effect of Atomic Nitrogen on the C<sub>60</sub> Cage

Hidefumi Nikawa,<sup>†</sup> Yasuyuki Araki,<sup>‡</sup> Zdenek Slanina,<sup>†</sup> Takahiro Tsuchiya,<sup>†</sup> Takeshi Akasaka,<sup>\*,†</sup> Takehiko Wada,<sup>‡</sup> Osamu Ito,<sup>‡</sup> Klaus-Peter Dinse,<sup>#</sup> Masafumi Ata,<sup>¶</sup> Tatsuhisa Kato,<sup>%</sup> & Shigeru Nagase<sup>§</sup>

<sup>†</sup> Center for Tsukuba Advanced Research Alliance, University of Tsukuba, 1-1-1 Tennodai, Tsukuba, Ibaraki 305-8577, Japan.

<sup>‡</sup> Institute of Multidisciplinary Research for Advanced Materials, Tohoku University, Sendai, Miyagi 980-8577, Japan.

<sup>¶</sup> Technology Information Department, National Institute of Advanced Industrial Science and Technology (AIST) and Headquarters, Office, Ministry of Economy, Trade and Industry, 1-3-1 Kasumigaseki, Chiyodaku, Tokyo 100-8921, Japan.

<sup>#</sup> Physical Chemistry III, Darmstadt University of Technology, Petersenstrasse 20, D-64287 Darmstadt, Germany.

<sup>%</sup> Department of Chemistry, Josai University, Sakado 171-8501, Japan.

<sup>§</sup> Department of Theoretical and Computational Molecular Science, Institute for Molecular Science, Okazaki 444-8585, Japan.

#### Table of contents

#### Experimental details.

**Figure S1.** (a) HPLC profile of the sublimed soot containing N@C<sub>60</sub> and (b) its expanded view. (c) EPR spectra of the soot and each fraction (I-IV) after separation by HPLC in toluene.

**Figure S2.** EPR spectra of N@C<sub>60</sub> in toluene.

**Figure S3.** Decay profiles of N@C<sub>60</sub> (red line), a mixture of N@C<sub>60</sub>/C<sub>60</sub> (6:4) (blue line), and C<sub>60</sub> (black line) at 750 nm in Ar-saturated toluene at room temperature.

**Figure S4.** Decay profiles of N@C<sub>60</sub> at 750 nm in Ar-saturated toluene at room temperature. The inset shows first-order plots.

**Figure S5.** Decay profiles of a mixture of N@C<sub>60</sub>/C<sub>60</sub> (6:4) at 750 nm in Ar-saturated toluene at room temperature. The inset shows first-order plots.

**Figure S6.** Decay profiles of C<sub>60</sub> at 750 nm in Ar-saturated toluene at room temperature. The inset shows first-order plots.

**Figure S7.** Decay profiles of N@C<sub>60</sub> at 750 nm with different laser power in deaerated toluene at room temperature. The inset shows pseudo-first-order plots.

**Figure S8.** Decay profiles of C<sub>60</sub> at 750 nm with different laser power in deaerated toluene at room temperature. The inset shows pseudo-first-order plots.

**Figure S9.** <sup>1</sup>O<sub>2</sub> phosphorescence emission spectra in the near-IR region observed by the 400 nm laser irradiation of N@C<sub>60</sub> (filled circles) and C<sub>60</sub> (open circles) in O<sub>2</sub>-saturated toluene.

## Experimental details

N@C<sub>60</sub> was prepared by the nitrogen bombardment method and successfully isolated from a crude mixture of N@C<sub>60</sub>, C<sub>60</sub>, C<sub>60</sub>O, and so on using a multi-step and recycling HPLC system. HPLC was performed by a Cosmosil Buckyprep column ( $\phi$  20 × 250 mm) and toluene as eluent at a flow rate of 9.9 mL/min at room temperature (Figure S1a, b). To clarify the location of N@C<sub>60</sub> in the chromatogram, the C<sub>60</sub> peak was divided into four fractions and each fraction was measured by electron paramagnetic resonance (EPR) measurements using  $\phi$ 5mm quartz tube (Figure S1c). The volume of EPR sample and concentration of C<sub>60</sub> for each fraction was 200  $\mu$ L and 1g/L, respectively. Figure S1a shows the HPLC diagram of our fullerene sample after preparation by nitrogen bombardment method. The vertical lines define the different fractions in which the C<sub>60</sub> peak was divided (Figure S1b). In Figure S1c, the EPR spectra of the fractions I to IV are displayed. The triplet seen in the lower three spectra is the fingerprint of N@C<sub>60</sub>; the intensity (peak-to-peak height) is a direct measure of the amount of N@C<sub>60</sub> in the sample. The highest intensity is found in the third fraction, i.e. at the upper tail of the C<sub>60</sub> peak. Thus N@C<sub>60</sub> is clearly delayed in our column, compared to C<sub>60</sub>, and enrichment is possible. Consequently, this preparative HPLC was repeated tens of times for the enrichment of N@C<sub>60</sub>. Finally, several tens of  $\mu$ g N@C<sub>60</sub> was isolated by recycling HPLC system.

The EPR measurements were performed with a conventional continuous wave spectrometer in the X band (about 9.4 GHz). Figure 2 shows the three characteristic <sup>14</sup>N EPR lines ( $g = 2.0028$ ,  $hfc = 5.67$  G) of the sample irradiated with <sup>14</sup>N atom (nuclear spin  $I = 1$ , NA = 99.634%) and the doublet <sup>15</sup>N EPR lines ( $g = 2.0028$ ,  $hfc = 7.96$  G) from the sample irradiated with <sup>15</sup>N atom (nuclear spin  $I = 1/2$ , NA = 0.366%). The line splitting is due to the hyperfine interaction with the nuclear spin.

Figure S3-S6 show the decay kinetics of excited states of Ar-saturated toluene solutions of N@C<sub>60</sub>, N@C<sub>60</sub>/C<sub>60</sub>(3:2), and C<sub>60</sub> at room temperature. These spectra demonstrated that the presence of the N atom enhances the intrinsic first order decay of (N@C<sub>60</sub>)\*. Meanwhile, these decay times are influenced a great deal by the concentration of residual oxygen in the solution, because these excited species are quenched by oxygen. To shed undoubtedly light on the effect of the N atom on C<sub>60</sub> cage in the excited state, we have performed laser flash photolysis of the deoxygenated toluene solutions of N@C<sub>60</sub> and C<sub>60</sub> (Figure S7-S8). The decay rates of the excited states were strongly affected by the laser power as shown in Figure S7 and S8. The decay time profiles are composed of mixed-order kinetics of first- and second-order, in which the former is the intrinsic decay rate of the excited state and the latter is due to the annihilation process among the excited species such as triplet-triplet annihilation in the case of C<sub>60</sub>. The decay rates of the excited states were strongly affected by the laser power as shown in Figure S7 and S8. The decay time profiles are composed of mixed-order kinetics of first- and second-order, in which the former is the intrinsic decay rate of the excited state and the latter is due to the annihilation process among the excited species such as triplet-triplet annihilation in the case of C<sub>60</sub>. As shown in an inset of Figure S7 and S8, plot of  $\Delta k_T$  to  $\Delta A_0$  shows a linear correlation. From this slope, an intrinsic first-order decay rate ( $\Delta k_T^0$ ) of the excited state was estimated.

<sup>3</sup>C<sub>60</sub>\* is well known to be quenched efficiently by molecular oxygen (O<sub>2</sub>) to generate singlet oxygen (<sup>1</sup>O<sub>2</sub>). The quenching of <sup>3</sup>C<sub>60</sub>\* by molecular oxygen (O<sub>2</sub>) is generally probed by monitoring the decrease of the triplet-triplet absorption and the increase of the emission from <sup>1</sup>O<sub>2</sub> at 1272 nm. The lifetime of <sup>m</sup>(N@C<sub>60</sub>)\* decreased in a O<sub>2</sub>-saturated toluene solution and the emission from <sup>1</sup>O<sub>2</sub> was observed at 1274 nm (Figure S9). This may reveal that <sup>m</sup>(N@C<sub>60</sub>)\* is quenched by triplet oxygen (<sup>3</sup>O<sub>2</sub>) as well as <sup>3</sup>C<sub>60</sub>\* and the quantum yield ( $\Phi_{ISC}$ ) for formation of <sup>m</sup>(N@C<sub>60</sub>)\* via intersystem crossing from <sup>3/2</sup>(N@C<sub>60</sub>)\* was estimated as same as that of <sup>3</sup>C<sub>60</sub>\* ( $\Phi_{ISC} = 0.96$ ).

The MALDI-TOF MS were measured on a BIFLEXTM III (Bruker, Germany) with 1,1,4,4-tetraphenyl-1,3-butadiene as a matrix. <sup>13</sup>C NMR spectra at 125 MHz were measured on a Bruker AVANCE 500 spectrometer with a CryoProbe system in carbon disulfide with a capillary tube of acetone-*d*<sub>6</sub> as an external lock. UV-vis-NIR spectra were measured on a UV 3150 (Shimadzu, Japan) in toluene. The nanosecond transient absorption spectra were measured by using 532 nm laser light (SHG) of a Nd:YAG laser (Spectra-Physics, Quanta-Ray GCR-130) as an excitation source. A continuous xenon flash lamp was used as a probe light. A Ge-APD module (Hamamatsu Photonics, B2834) attached to a monochromator (Ritsu MC-10N) was employed as a detector of transient absorption spectra in the visible and near-IR regions (400-1000 nm). Emission spectra of the singlet oxygen (<sup>1</sup>O<sub>2</sub>\*) in the near-IR regions were detected by using an InGaAs detector. All the spectral measurements were carried out in 1 cm optical cell. All calculations were carried out using the Gaussian 03 program. Geometries were optimized with the hybrid density functional theory at the B3LYP level<sup>i,ii,iii</sup> with the 6-31G(d) basis set<sup>iv</sup> for C and N,

while the chemical shifts were evaluated with the MPW1K functional<sup>v</sup> and the same basis set and calibrated to the observation.<sup>vi</sup>

- i) A. D. Becke, *Phys. Rev. A*, 1988, **38**, 3098.
- ii) A. D. Becke, *J. Chem. Phys.*, 1993, **98**, 5648.
- iii) C. Lee, W. Yang and R. G. Parr, *Phys. Rev. B*, 1988, **37**, 785.
- iv) W. J. Hehre, R. Ditchfield and J. A. Pople, *J. Chem. Phys.*, 1972, **56**, 2257.
- v) B. J. Lynch, P. L. Fast, M. Harris and D. G. Truhlar, *J. Phys. Chem. A*, 2000, **104**, 4811.
- vi) G. Y. Sun and M. Kertesz, *J. Phys. Chem. A* 2000, **104**, 7398.

**Figure S1.**

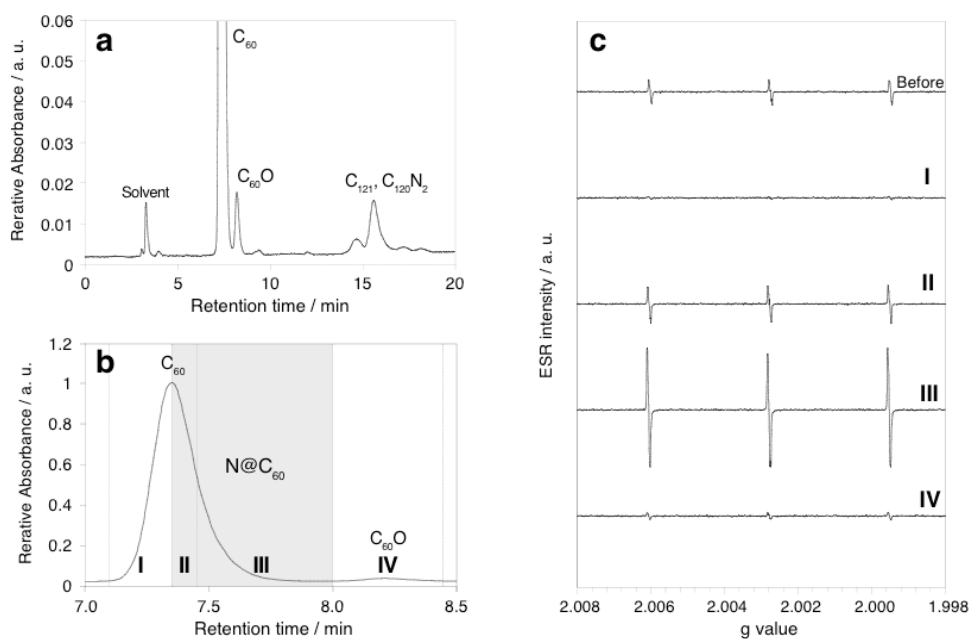

**Figure S2.**

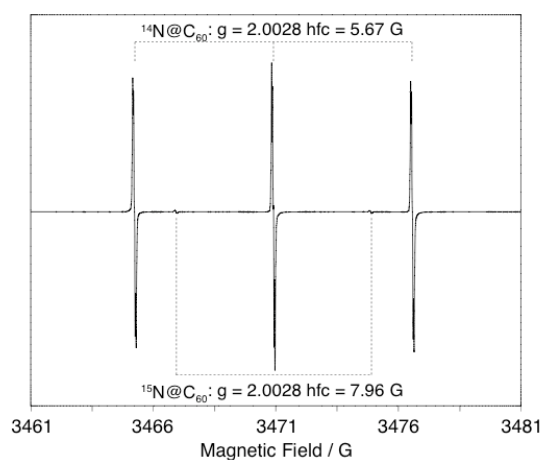

**Figure S3.**

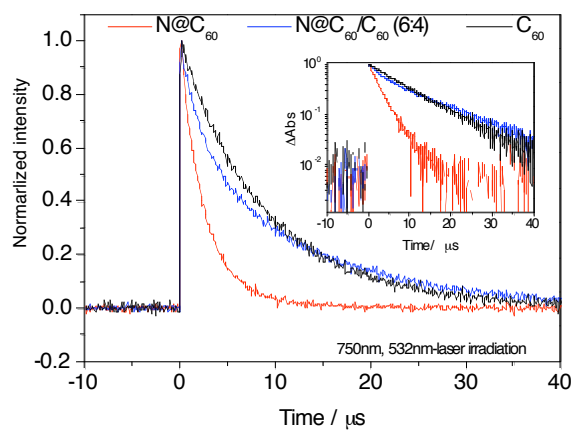

**Figure S4.**

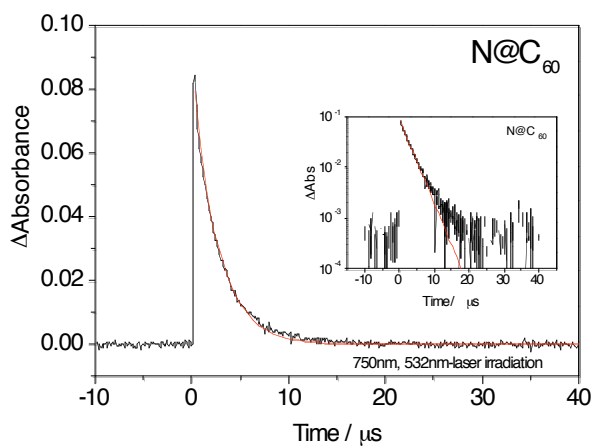

**Figure S5.**

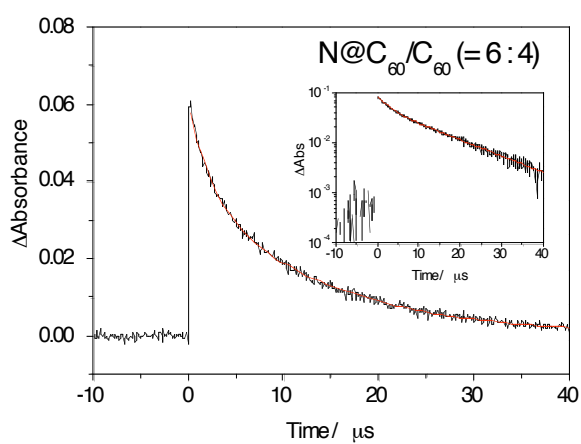

**Figure S6.**

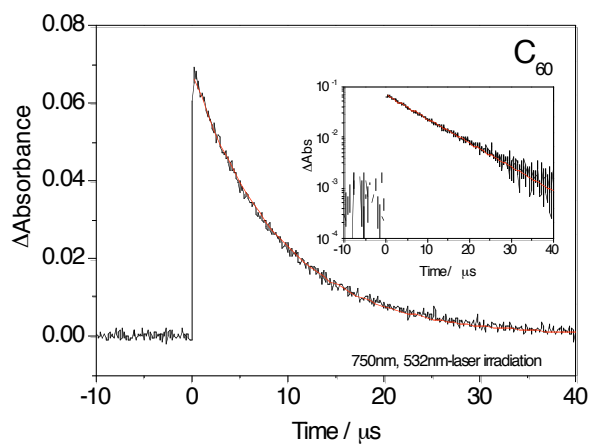

**Figure S7.**

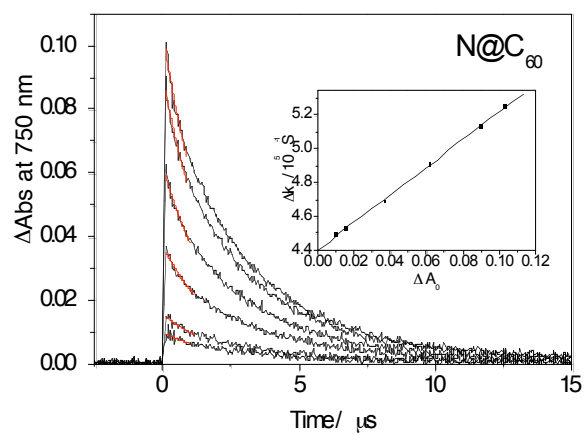

**Figure S8.**

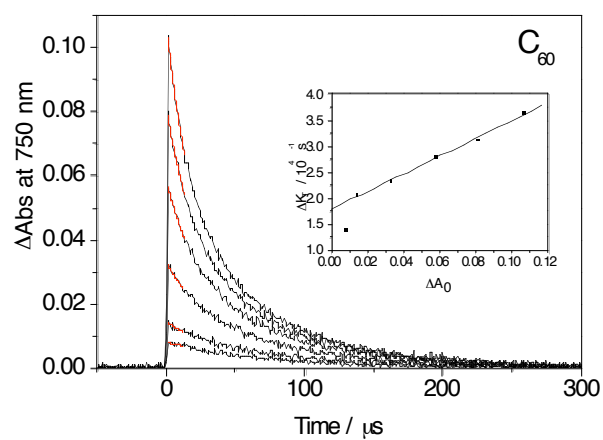

**Figure S9.**

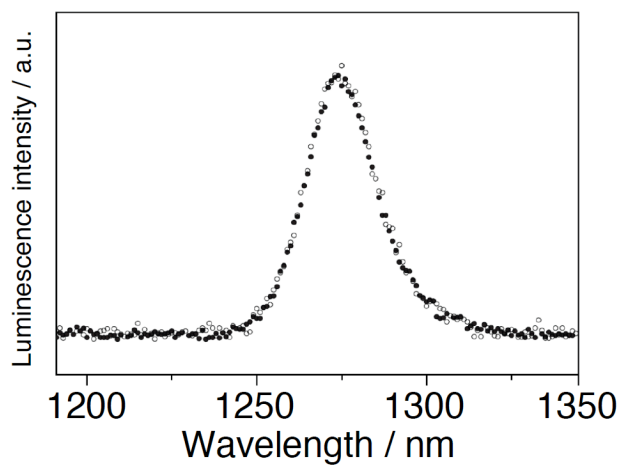

Supplement: b914624e.pdf [file b914624e.pdf]
